# Supplementary material for: De Tahití a Belgrad passant per Tamarit: viatges i viatgers a la fin de segle
Source: MDPI journal article supplement (doi:10.3390/molecules28217409), 1999-01-01

# Cloning and Functional Characterization of NADPH- Cytochrome P450 Reductases in *Aconitum vilmorinianum*

Jingping Cheng <sup>1</sup>, Guodong Li <sup>1</sup>, Xue Wang <sup>1</sup>, Congwei Yang <sup>1</sup>, Furong Xu <sup>1</sup>, Zigang Qian <sup>1,\*</sup>  
and Xiaohui Ma <sup>1,2,\*</sup>

<sup>1</sup> College of Chinese Materia Medica, Yunnan Key Laboratory of Southern  
Medicinal Utilization, Yunnan University of Chinese Medicine,  
Kunming 650500, China

<sup>2</sup> Key Laboratory of Yunnan Provincial Department of Education on Substance  
Benchmark Research of Ethnic Medicines, Kunming 650500, China

\* Correspondence: qianzig@aliyun.com (Z.Q.); maxiaohui1988@126.com (X.M.)

**Table S1.** List of primers used in this study.

| Primer code   | Sequence                                      |
|---------------|-----------------------------------------------|
| 32a-AvCPR1-F  | GGTACCCTCGAGGGATCCATGCAATCCGATTCGGTGAAAATC    |
| 32a-AvCPR1-R  | TCTAGACTGCAGGTCGACTCACCATAACATCACGGAGATACCGT  |
| 32a-AvCPR2-F  | GGTACCCTCGAGGGATCCATGGACTCGGAGTCGGTGAAG       |
| 32a-AvCPR2-R  | TCTAGACTGCAGGTCGACTTACCATAACATCACGCAGATACCTT  |
| 32a-tAvCPR1-F | ATGGCTGATATCGGATCCATGAGGAGATCTTCCGCCAAG       |
| 32a-tAvCPR1-R | GCGGCCGCAAGCTTGTCGACGTCACCATAACATCACGGAGATAC  |
| 32a-tAvCPR2-F | ATGGCTGATATCGGATCCATGAGAAGATCGTCGGGGAAG       |
| 32a-tAvCPR2-R | GCGGCCGCAAGCTTGTCGACGTTACCATAACATCACGCAGATACC |
| His-AvCPR1-F  | AAGAATTTTTGAAAATTCATGCAATCCGATTCGGTGAAA       |
| His-AvCPR1-R  | GTAATCCATCGATACTAGTCACCATAACATCACGGAGATAC     |
| His-AvCPR2-F  | AAGAATTTTTGAAAATTCATGGACTCGGAGTCGGTGAAG       |
| His-AvCPR2-R  | GTAATCCATCGATACTAGTTACCATAACATCACGCAGATACC    |
| qPCR-AvCPR1-F | GGCTTCAGGACCTTCAGTTT                          |
| qPCR-AvCPR1-R | CACCATGTTTCAGCAAGGATTTC                       |
| qPCR-AvCPR2-F | CGATCCTCTACGGA ACTCAAAC                       |
| qPCR-AvCPR2-R | ACCAC TTTGAATACTGCCTTCT                       |

**Table S2.** Protein physical and chemical properties of AvCPRs.

| Protein physical and chemical properties | AvCPR1                 | AvCPR2                 |
|------------------------------------------|------------------------|------------------------|
| Molecular weight                         | 78.00 kDa              | 77.57 kDa              |
| Theoretical pI                           | 5.46                   | 5.24                   |
| Formula                                  | C3481H5419N937O1046S27 | C3460H5385N919O1051S28 |
| Instability index                        | 44.09                  | 35.78                  |
| Aliphatic index                          | 80.97                  | 80.67                  |
| Grand average of hydropathicity          | -0.300                 | -0.268                 |

**Table S3.** Secondary Structure of AvCPRs.

| Secondary Structure | AvCPR1       | AvCPR2       |
|---------------------|--------------|--------------|
| Alpha helix         | 285 (40.71%) | 294 (42.06%) |
| Beta turn           | 32 (4.57%)   | 27 (3.86%)   |
| Bend region         | 103 (14.71%) | 97 (13.88%)  |
| Random coil         | 280 (40.00%) | 281 (40.20%) |

**Figure S1.** Transmembrane region analyses of AvCPR proteins. **(a)** AvCPR1. **(b)** AvCPR2.

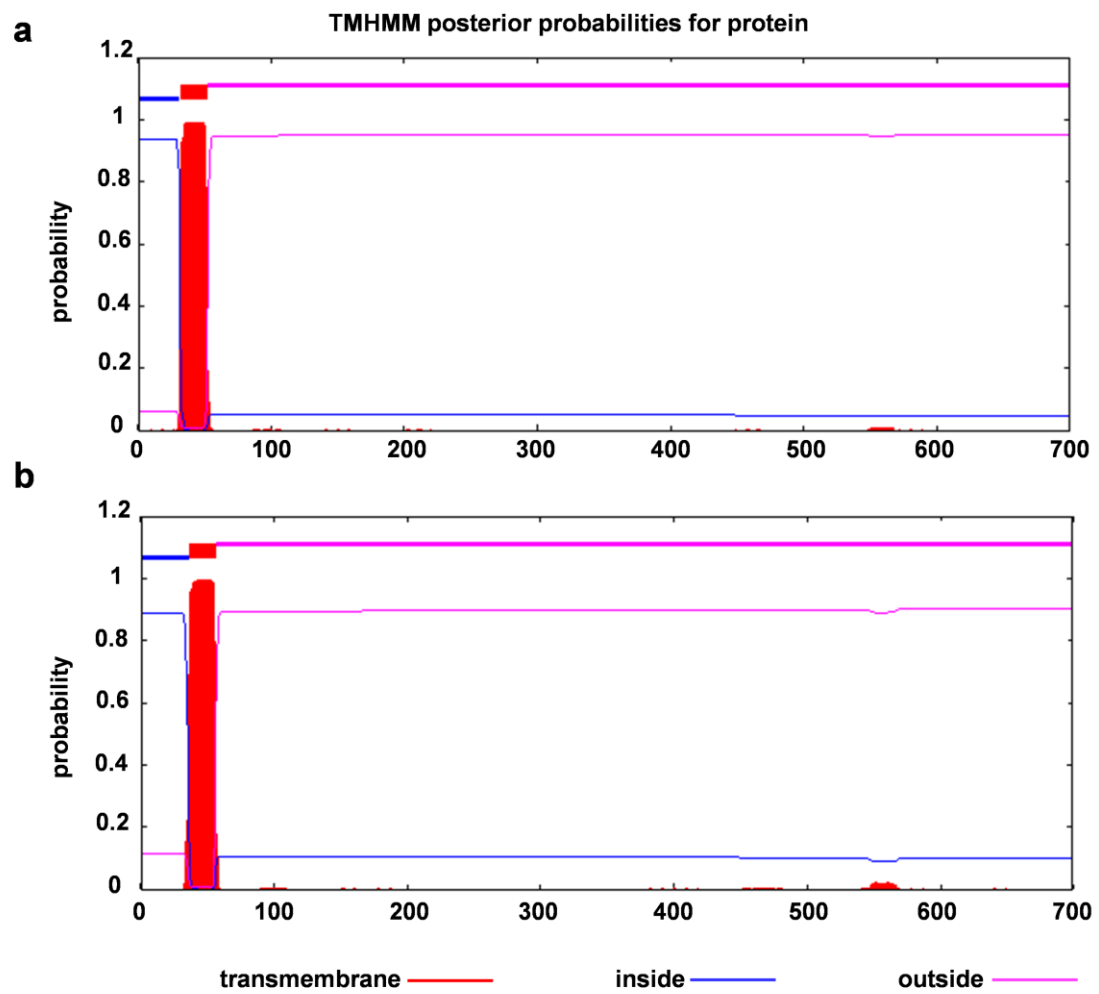

**Figure S2.** The predicted 3-D structure of AvCPRs. **(a, c)** AvCPR1. **(b, d)** AvCPR2. **(a-b)** 3-D structure of AvCPRs built by Phyre 2 server. **(c-d)** functional and structural residues of AvCPRs with high scores were highlighted in purple.

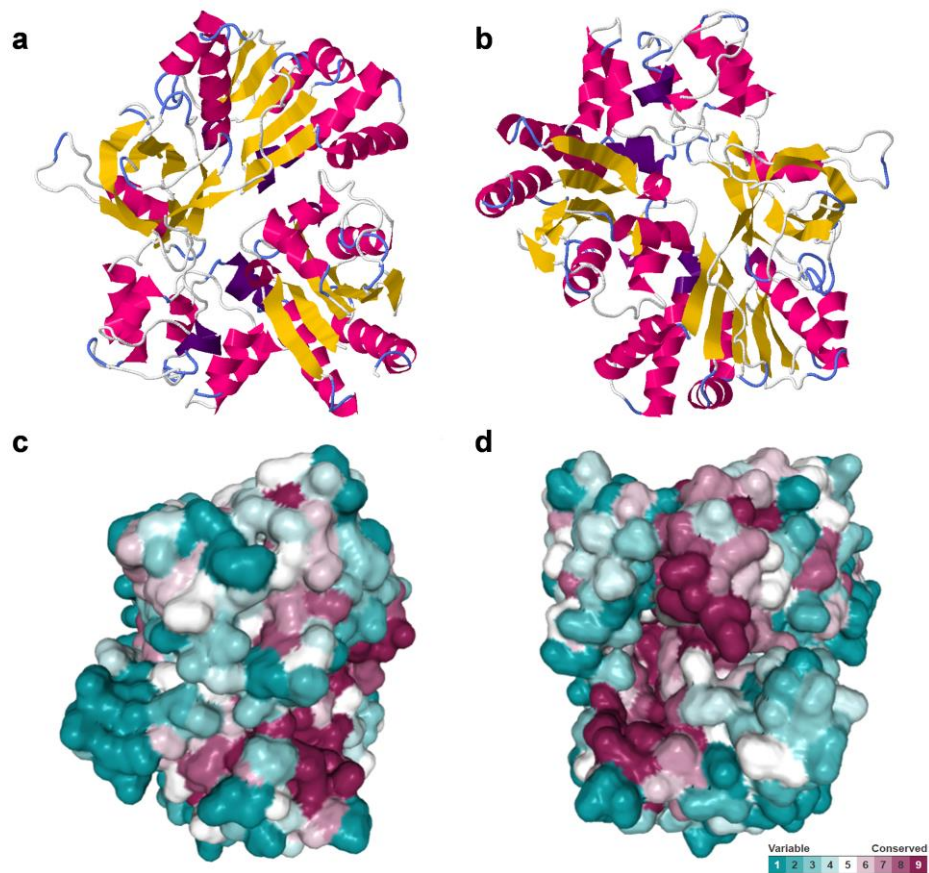

**Figure S3.** Spatial conformation of AvCPRs bound to ligands. The ligands FMN, FAD and NADPH are shown as blue, purple and light blue, respectively. The conformations were built on Chimera 1.15.

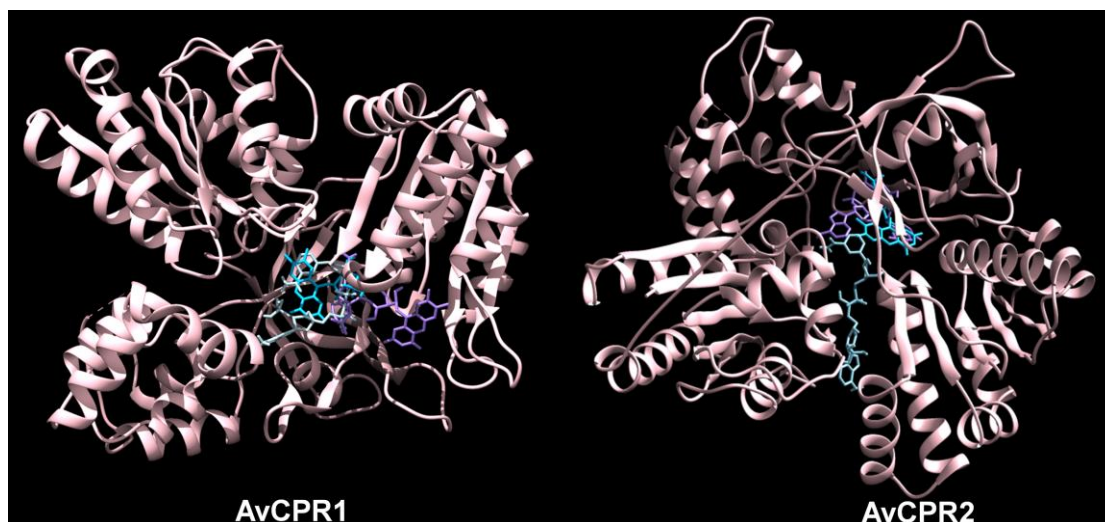

**Figure S4.** Electrostatic energy of AvCPRs binding surface to FMN and FAD. (a) AvCPR1. (b) AvCPR2. The ligands FMN and FAD are shown as blue and warm pink, respectively. The active binding sites were visualized in PyMol software.

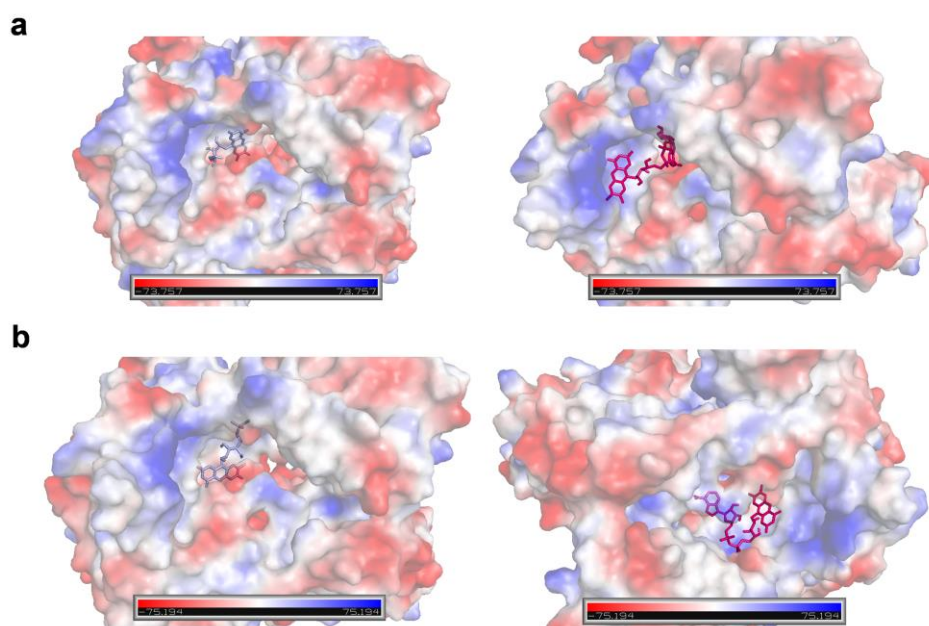

Supplement: s1 [file s1]
